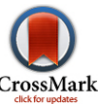

# Changes in Expression Pattern of Selected Endometrial Proteins following Mesenchymal Stem Cells Infusion in Mares with Endometrosis

Lisley I. Mambelli<sup>1,2</sup>, Rodrigo C. Mattos<sup>3</sup>, Gustavo H. Z. Winter<sup>3</sup>, Dener S. Madeiro<sup>1</sup>, Bruna P. Morais<sup>1</sup>, Eduardo Malschitzky<sup>4</sup>, Maria Angélica Miglino<sup>2</sup>, Alexandre Kerkis<sup>1</sup>, Irina Kerkis<sup>1\*</sup>

**1** Laboratório de Genética, Instituto Butantan, São Paulo, SP, Brasil, **2** Programa de Pós-Graduação em Anatomia dos Animais Domésticos e Silvestres da Faculdade de Medicina Veterinária e Zootecnia da Universidade de São Paulo, São Paulo, SP, Brasil, **3** Reprolab, Faculdade de Medicina Veterinária, Universidade Federal do Rio Grande do Sul, Porto Alegre, RS, Brasil, **4** Curso de Medicina Veterinária, ULBRA, Canoas, RS, Brasil

## Abstract

Mesenchymal stem cells (MSCs) due to their self-renewal potential and differentiation capacity are useful for tissue regeneration. Immunomodulatory and trophic properties of MSCs were demonstrated suggesting their use as medicinal signaling cells able to positively change local environment in injured tissue. Equine endometrosis is a progressive degenerative disease responsible for glandular alterations and endometrial fibrosis which causes infertility in mares. More precisely, this disease is characterized by phenotypic changes in the expression pattern of selected endometrial proteins. Currently, no effective treatment is available for endometrosis. Herein, we aimed at the evaluation of expression pattern of these proteins after allogeneic equine adipose tissue-derived multipotent mesenchymal stem cells (eAT-MSCs) infusion as well as at testing the capacity of these cells to promote endometrial tissue remodeling in mares with endometrosis. eAT-MSC ( $2 \times 10^7$ /animal) were transplanted into mares' uterus and control animals received only placebo. Uterine biopsies were collected before (day 0) and after (days 7, 21 and 60) cells transplantation. Conventional histopathology as well as expression analysis of such proteins as laminin, vimentin, Ki-67-antigen,  $\alpha$ -smooth muscle actin ( $\alpha$ -SMA) and cytokeratin 18 (CK18) have been performed before and after eAT-MSCs transplantation. We demonstrated that eAT-MSCs induced early (at day 7) remodeling of endometrial tissue microenvironment through changes observed in intra cellular and intra glandular localization of aforementioned proteins. We demonstrated that eAT-MSCs were able to positively modulate the expression pattern of studied secretory proteins as well as, to promote the induction of glandular epithelial cells proliferation suggesting local benefits to committed endometrial tissue environment after eAT-MSCs transplantation.

**Citation:** Mambelli LI, Mattos RC, Winter GHZ, Madeiro DS, Morais BP, et al. (2014) Changes in Expression Pattern of Selected Endometrial Proteins following Mesenchymal Stem Cells Infusion in Mares with Endometrosis. PLoS ONE 9(6): e97889. doi:10.1371/journal.pone.0097889

**Editor:** Serge Nataf, University of Lyon, France

**Received:** October 9, 2013; **Accepted:** April 25, 2014; **Published:** June 5, 2014

**Copyright:** © 2014 Mambelli et al. This is an open-access article distributed under the terms of the Creative Commons Attribution License, which permits unrestricted use, distribution, and reproduction in any medium, provided the original author and source are credited.

**Funding:** This work was supported by the Sao Paulo Research Foundations (Fundação de Amparo à Pesquisa do Estado de São Paulo – FAPESP. Grant numbers: 2006/51839-7(PIPE); 2007/50212-3 (BP.IC); 2009/06764-7 (BP.MS)) and Coordination of Improvement of Higher Education Personnel (Coordenação de Aperfeiçoamento de Pessoal de Nível Superior – CAPES) – fellowship. The funders had no role in study design, data collection and analysis, decision to publish, or preparation of the manuscript.

**Competing Interests:** The authors have declared that no competing interests exist.

\* E-mail: irina.kerkis@butantan.gov.br

## Introduction

Equine endometrosis is a degenerative disease of uterine glands and surrounding stroma which leads to infertility [1,2]. In mares, the trophoblast is non-invasive and uterine glands secretions are considered essential to embryo implantation, fetal development and survival. According to [3], endometrosis is defined as an active (can produce all secreted proteins) or inactive periglandular and/or stromal endometrial fibrosis including glandular alterations within fibrotic foci. Single glands and/or glandular nests can be affected [3]. It is not clear if hormonal changes, during reproductive cycle, are involved in the progress of this disease [4–7].

In order to provide more precise diagnosis and to characterize phenotypic variations of the uterus surface of mares with endometrosis, the expression pattern of selected endometrial proteins such as steroid hormone receptors, protein of proliferation intensity (Ki-67-antigen), the filaments vimentin, desmin,  $\alpha$ -

smooth muscle actin ( $\alpha$ -actin), laminin and others have been studied [7–9]. These studies demonstrated that affected equine endometrium seems unable to provide an appropriate environment for the correct expression of these proteins when compared with healthy endometrium [7,8]. However, until now the etiology of endometrosis is not defined and no effective treatment is available.

MSCs can be isolated from different adult sources and bone marrow and adipose tissue are more commonly used in researches. These cells have the capacity to differentiate into several tissues of mesoderm and ectoderm origin including bone, cartilage, tendon, muscle, adipose and neurons. MSCs secrete a diverse set of bioactive molecules which are immunomodulatory [10,11]. Other molecules released by MSCs provide regeneration and remodeling of injured tissue through their trophic activities [12,13], which involve inhibition of apoptosis, stimulation of MSC-mediated angiogenesis by secretion of VEGF, as well as anti-scar formation [14]. Finally, MSCs secrete mitogens which stimulate tissue-

intrinsic progenitors to divide and appropriately differentiate [15,16]. Thus, proposed clinical application of MSCs suggested their use as medicinal signaling cells which can be used as site-regulated, multidrug dispensaries, or “drugstores” able to promote and support the natural regeneration of focal injuries [13].

Previously, we isolated and successfully expanded *in vitro* multipotent equine adipose tissue-derived mesenchymal stem cells (eAT-MSCs) which present significant proliferative rate [17]. These cells were able to differentiate efficiently into mesodermal derivatives such as bone, cartilage and adipose tissue. Undifferentiated state and differentiation capacity of eAT-MSCs are maintained even after cryopreservation [17]. Based on current knowledge about the expression pattern of selected endometrial proteins, we aimed at analyzing the capacity of allogeneic eAT-MSCs previously isolated by our group to influence the expression of these proteins in mares’ endometrial tissue leading to positive local remodeling. It is important to highlight that in present work we are not tending to evaluate clinical effect of these cells once clinical studies will be our next challenge.

## Materials and Methods

### Animals

All studies were approved by the ethical committee of the School of Veterinary Medicine and Animal Science, University of Sao Paulo, SP, Brazil (Protocol 1804/2009). Six cyclic and healthy mares of various breeds, aging between 6 and 21 years with different degrees of endometriosis were used. These mares were part of an experimental herd and were maintained at the Faculty of Veterinary Medicine, Federal University of Rio Grande do Sul, in an open field supplemented with oats and alfalfa hay with ad libitum access to water.

An endometrial biopsy of each mare was taken immediately prior to the infusion of our cells and used to classify the degree of endometriosis. Three animals were classified as grade IIb and other three as grade III [18]. A mare from each grade was used as control. Mares were examined for reproductive soundness including evaluation of perineal conformation, transrectal palpation and ultrasound of genital tract, vaginal examination with speculum, bacteriological cultures and endometrial cytology. Only clinically normal mares with negative cytology and negative cultures were used.

Time of estrus was synchronized with prostaglandin F<sub>2α</sub> (Lutalyse 5 mg im—Pharmacia Brasil Ltda., Sao Paulo, SP, Brasil) and it was confirmed by the presence of a dominant follicle (≥

35 mm), uterine edema (2–3) and no corpus luteum at the time of cells transplantation.

### Cells

Equine adipose tissue-derived multipotent mesenchymal stem cells (eAT-MSC) previously isolated and characterized by our group [17] were used. These cells have been cryopreserved in liquid nitrogen for two years. Cells were thawed and used immediately for fluorescent labeling and transplantation. Before cells transplantation and after labeling, eAT-MSC were tested by trypan blue assay and the viability (~98%) of them was confirmed.

### Fluorescent eAT-MSCs Labeling

To label the cells, Vybrant CFDA SE Cell Tracer Kit fluorescent-nanocrystal dye (green) (Invitrogen, Carlsbad, CA, USA; V12883) was used. CFDA SE 10 mM stock solution was prepared immediately prior to use by dissolving the contents of one vial (Component A) in 90 μL of high-quality DMSO provided in the kit (Component B). Next, stock solution was diluted in phosphate-buffered saline (PBS) until the desired working concentration of 25 μM was reached. eAT-MSCs were thawed just before staining and washed twice in DMEM-HG. Cell pellets were obtained by centrifugation (100×g, 5 min) and the supernatant was aspirated. Next, eAT-MSCs were gently resuspended in pre-warmed (37°C) PBS containing the probe and then incubated for 15 minutes at 37°C. Cells were re-pelleted by centrifugation and resuspended in 20 ml of fresh pre-warmed 0.9% physiologic solution for further uterine infusion into the mares.

### Experimental Cell Transplantation

The procedure of eAT-MSCs infusion was performed during synchronized estrus according as previously reported [19]. After cleaning the perineal area, the operator wearing a sterile insemination glove, introduced a disposable insemination pipette through the cervix to the uterus body. In order to avoid eventual contaminants, the gloved hand was placed over the tip of the pipette during its introduction into the vagina. At this time, the pipette was guided toward the tip of the right horn helped by rectal palpation. The pipette was connected to the syringe containing  $2 \times 10^7$  cells diluted in 20 ml of 0.9% sodium chloride through a sterile rubber connector. The plunger of the syringe was slowly depressed introducing 10 ml of cells suspension. Then, the free end was placed in the left uterine horn and the remainder (10 ml of cells suspension) was infused. Immediately, a second syringe containing 3 ml of 0.9% sodium chloride was coupled to sterile

**Table 1.** Antibodies used in immunohistochemistry.

| Primary antibodies                | Host   | Type       | Dilution | Source                            |
|-----------------------------------|--------|------------|----------|-----------------------------------|
| α-Actinin <sup>1</sup>            | Mouse  | Monoclonal | 1:200    | Chemicon, CA, USA                 |
| CD10 <sup>1</sup> (clone 56C6)    | Mouse  | Monoclonal | 1:25     | AbCam, San Francisco, USA         |
| Cytokeratin 18 <sup>1</sup>       | Mouse  | Monoclonal | 1:200    | Cell Marque, CA, USA              |
| ER <sup>1</sup> (clone 14C8)      | Mouse  | Monoclonal | 1:100    | Thermo Scientific, CA, USA        |
| Ki-67 <sup>1</sup>                | Rabbit | Polyclonal | 1:100    | Santa Cruz Biotechnology, CA, USA |
| Laminin <sup>1</sup>              | Rabbit | Polyclonal | 1:25     | AbCam, San Francisco, USA         |
| Vimentin <sup>2</sup> (clone C20) | Goat   | Polyclonal | 1:50     | Santa Cruz Biotechnology, CA, USA |

<sup>1</sup>IgG polyclonal goat anti-mouse + goat anti-rabbit HRP (secondary antibody).

<sup>2</sup>Polyclonal rabbit anti-goat HRP (secondary antibody).

doi:10.1371/journal.pone.0097889.t001

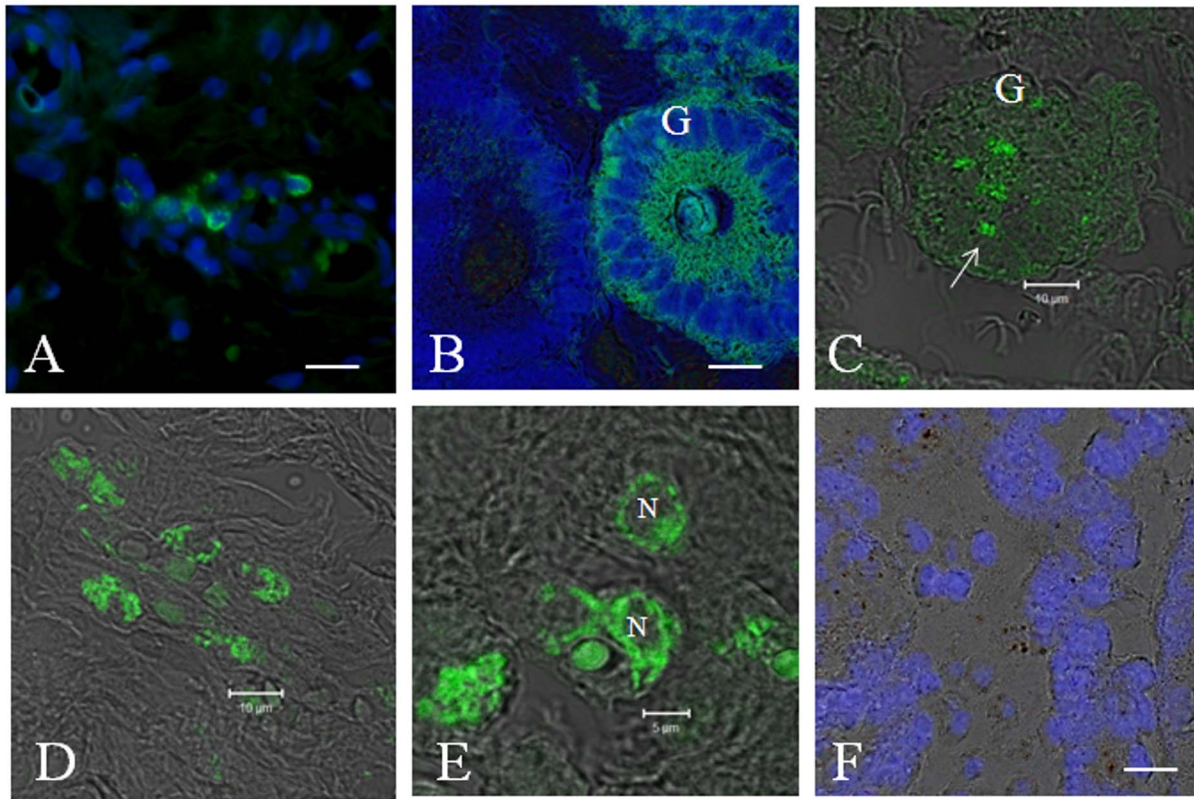

**Figure 1. Homing of eAT-MSCs (green fluorescence) after transplantation in endometrium of mares with endometriosis.** A) Homing of eAT-MSCs in periglandular space B) eAT-MSC contribution into the whole uterine gland (G). White arrow indicates uterine gland without eAT-MSCs. C) Incorporation of several eAT-MSC (white arrow) into uterine gland epithelia. D–E) eAT-MSCs localization in periglandular space. N–Nucleus. F) Control animals injected with only saline solution. A, B, F = nucleus stained by DAPI (blue). Confocal microscopy: Fluorescence (Fcm) + Digital Interference Contrast (DIC). A–B = Fcm. C–F = Fcm + DIC. Scale bars: A, C, D = 10 µm; B, E, F = 5 µm.  
doi:10.1371/journal.pone.0097889.g001

pipette infused in order to ensure the total injection of the volume contained in the pipette and in the connector. The pipette was slowly withdrawn from the vagina.

The two controls mares were infused with 20 ml of 0.9% sodium chloride (10 ml in each horn) performing the same technique used to cell infusion.

Biopsies from the uterine body and both horns from treated and control mares were collected 7, 21 and 60 days after infusion. A total of 60 endometrial uterine biopsies from the six mares, were analyzed by four different pathologists in a blind manner. Uterine biopsies were fixed in 10% buffered formalin, embedded in paraplast, sectioned at 4–5 µm and stained with Hematoxylin and Eosin (HE). Degree of endometriosis was analyzed according to [3] and [2,20,21]. All specimens showed signs of endometriosis varying in quantity and degree (mild to severe).

### Immunohistochemistry

The peroxidase anti-peroxidase (PAP) method was used for immunohistochemistry. Tissue sections were mounted on superfrost slides (Life Science Int. GmbH, Frankfurt/Main, Germany). Paraffin wax sections were rehydrated and endogenous peroxidase activity was inhibited by 3% H<sub>2</sub>O<sub>2</sub> (30 min). Primary antibodies were diluted in TBS (Tris-buffered saline) with 1% BSA (bovine serum albumin). Depending on the antibody, different dilutions and pretreatments were applied and are summarized in Table 1. All of these primary antibodies used in our research have been previously used in mares [8]. Primary monoclonal antibody

crossreacting with mouse antihuman CK18 as well as polyclonal antibodies rabbit antihuman Ki-67-antigen, rabbit antimouse laminin, rabbit antihuman fibronectin and goat antihuman vimentin were incubated at 4°C overnight. Negative control sections were treated with only secondary antibodies diluted in BSA. Rat antimouse (Dianova GmbH, Hamburg, Germany) and pig antirabbit IgG (Dako Diagnostika GmbH, Hamburg, Germany) were used as secondary antibodies and, as PAP-complex, served 1:500 diluted mouse PAP (Dianova GmbH, Hamburg, Germany) and rabbit PAP (Dako Diagnostika GmbH, Hamburg, Germany), respectively. Both were incubated at room temperature for 30 min. Slides were developed in DAB (diaminobenzidinetetrahydrochloride - Fluka Feinchemikalien Neu Ulm, Germany) and counterstained with HE. In order to interpret immunohistochemical results of the fibrotic foci, healthy endometrial structures within the same specimens were used as controls. Protein expression was detected using a Carl Zeiss Axioplan fluoromicroscope (LSM 410, Zeiss, Jena, Germany). Digital images were acquired with CCD camera (Applied Imaging model ER 339) and documentation system used was Cytovision v. 2.8 (Applied Imaging Corp. - Santa Clara, CA, USA).

### Confocal Microscopy

Images were collected using an LSM 510 (Zeiss) laser scanning confocal microscope and all slides were analyzed by four different pathologists in a blind manner. FITC was excited by argon-ion laser set at 488 nm and the emitted light filtered using a 505-nm

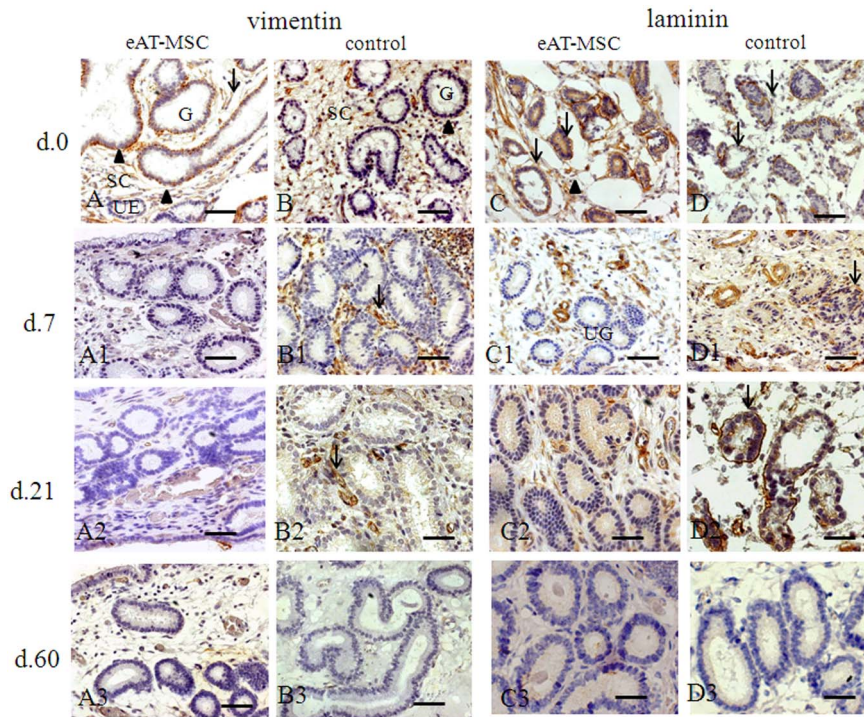

**Figure 2. Vimentin and laminin expression before (at day 0) and after (at days 7, 21 and 60) eAT-MSCs intrauterine transplantation: A–A3 and D–D3 - experimental; B–B3 and D–D3 - control.** A, B) At day 0, vimentin (black arrowheads) localized in damaged epithelia of glands (G) and in fibrotic stromal cells (SC, black arrows). Unaffected epithelia (UE) showed no signs of vimentin expression. A1–A3) At days 7, 21 and 60, the absence of vimentin expression. B1, B2) Vimentin expression is still observed (black arrows) at days 7 and 21, in control. B3) At day 60, control mares showed no signs of vimentin expression. C, D) At day 0, laminin demonstrated high discontinuity of epithelial basal lamina (black arrows) and a diffuse intracytoplasmic laminin expression in metabolic active fibrotic stromal cells (black arrowheads); C1, C2) At days 7 and 21, unaffected glands (UG) with a diffuse intracytoplasmic laminin expression were observed. C3) At day 60, the absence of vimentin expression was shown. D1, D2) At days 7 and 21, control maintains same pattern of laminin expression as in (D). D3) At day 60, laminin expression was not visualized in control. Light Microscopy (LM). Scale bars: A–C2 = 50  $\mu$ m; C3, D2, D3 = 25  $\mu$ m. doi:10.1371/journal.pone.0097889.g002

(FITC) long pass filter. Sections were taken at approximately the mid-height level of the cells.

### Ki-67 Expression Analysis

Ki-67 positive cells density may not be uniform in the biopsy; therefore epithelial cell proliferation rate in the glands was assessed by Ki-67 stained cells, as previously described by [22,23] in 250 cells of five different fields by two different specialists in a blind manner. The mean called proliferation index (P) and pattern deviation (Mean  $\pm$  SD) as well as positive stained nuclear cells in the 5 fields were calculated. Differences between treated and untreated animals are shown in percentage.

## Results

### Transplantation and Homing of eAT-MSCs

For eAT-MSCs transplantation in utero, cells ( $\sim 2 \times 10^7$ ) were placed in a catheter and infused immediately. In order to confirm allogeneic eAT-MSCs homing in endometrial tissue, direct fluorescence was used. The presence of fluorescently labeled eAT-MSCs (green) in mares' uterus was observed seven days after intrauterine cells infusion (Figure 1A–E). Figure 1F represents control mare infused with saline solution. eAT-MSCs were visualized in periglandular space (Figure 1A, D, E) as well as in single glands (Figure 1B, C) in three mares. One of the mares which presented advanced degree of chronic degenerative

endometriosis, did not show any eAT-MSCs engraftment (data not shown).

### Immunohistochemical Expression Study of Proteins before and after eAT-MSC Transplantation

In order to evaluate the benefits of eAT-MSCs transplantation and the engraftment of these cells in mares' uterus with endometriosis, the expression pattern of secretory proteins such as vimentin, laminin, Ki-67, smooth-muscle- $\alpha$ -actin and cytokeratin 18 (CK18) has been analyzed (Figures 2–4).

### Vimentin and Laminin

Basal expression of vimentin in fibrotic gland epithelia and in fibrotic stromal cells was observed in experimental (Figure 2A) and in control (Figure 2B) groups before cells transplantation. Such basal expression of vimentin was no longer observed in the glandular epithelia and stromal cells at day 7 after cells transplantation (Figure 2A1) as well as at days 21 and 60 (Figure 2A2, A3). In control group, the expression of vimentin was strong in fibrotic stromal cells at day 21 (Figure 2B1, B2) with no expression at day 60 (Figure 2B3).

Laminin expression was intense and before cell transplantation, a high discontinuity of epithelial basal lamina was noted, as well as, diffuse cytoplasmic expression in fibrotic stromal cells in all mares (Figure 2C, D). In biopsies obtained from mares which received the cells, diffuse intracytoplasmic expression of laminin in fibrotic stromal cells, but not in epithelial basal lamina

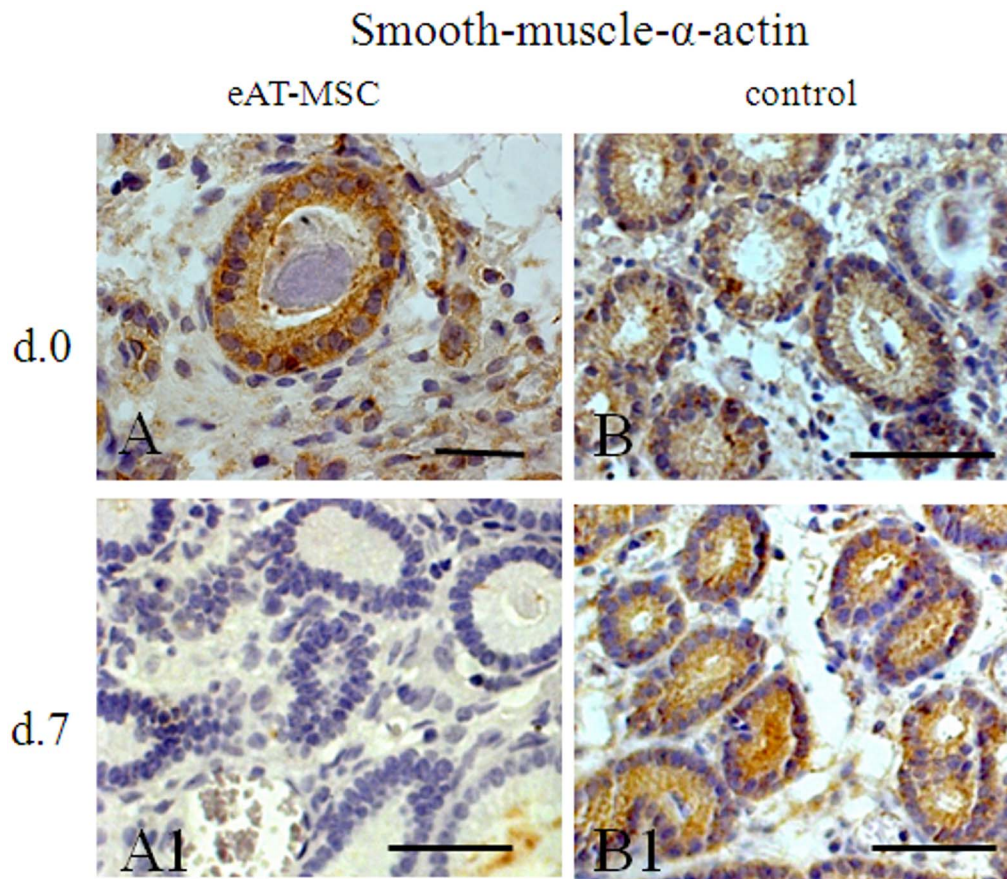

**Figure 3. Smooth-muscle- $\alpha$ -actin (SMA) expression before (at day 0) and after (at day 7) eAT-MSCs intrauterine transplantation.** A, B) At day 0, SMA expression was observed in uterine glands (white arrowhead) and in periglandular fibroblasts (black arrow). A1) At day 7, SMA showed no signs of expression. B) Pattern of SMA expression is similar to A and B. LM. Scale bars: A = 25  $\mu$ m; A1, B, B1 = 50  $\mu$ m. doi:10.1371/journal.pone.0097889.g003

(Figure 2C1, C2) was observed at days 7 and 21, with no expression at day 60 (Figure 2C3). In control group, an atypical expression pattern of laminin (Figure 2D) was maintained until days 7 and 21 (Figure 2D1, D2) and was no longer detected at day 60 (Figure 2D3).

### Smooth-muscle- $\alpha$ -actin

In all mares with endometriosis, the cystic dilated glands were coated by a distinct layer of cells positive for anti- $\alpha$ -SMA (Figure 3A, B). Additionally, this protein expression was detected in fibroblasts surrounding fibrotic uterine glands (Figure 3A). At day 7, in biopsies from mares which received eAT-MSCs, the expression of anti- $\alpha$ -SMA in glands, was no longer evidenced (Figure 3A1), while in control animals the expression of  $\alpha$ -SMA was still present (Figure 3B1). At days 21 and 60, the expression of this protein was no longer detected in both groups (data not shown).

### Cytokeratin 18

According to previous studies, cytokeratins are known to be expressed in epithelial glands of normal equine endometrium [24]. However, co-expression of cytokeratin and vimentin in mares' endometrium is exclusively associated with fibrotic areas or pathologically inactive endometrium [25]. Hence, CK18 expression was also evaluated. Similar to vimentin (Figure 2A, B), CK18 was expressed in uterine glands of all animals before cells

transplantation (Figure 4A, B). Starting from day 7, this protein expression was no longer observed in experimental group (Figure 4A1–A3), while in control group it was still expressed in uterine glands at day 7 and 21 (Figure 4B1–B2), but not at day 60 (Figure 4B3).

### Ki-67-antigen

In Figure 4(C–D3) the expression of Ki-67 antigen in uterine glands and in periglandular stromal cells is presented in both, experimental (Figure 4C–C3) and control groups (Figure 4D–D3). At day 0, none or few Ki-67 positive cells were observed in both groups (Figure 4C, D). At day 7, both groups showed an increased quantity, but still a small amount of Ki-67 positive cells (Figure 4C1 and D1). At day 21, Ki-67 positive cells significantly increased in both experimental (Figure 4C2), and control (Figure 4D2) groups. At day 60, two groups (experimental and control) had registered progressive decrease of proliferative cells in glands (Figure 4C3, D3). These qualitative data was confirmed by quantitative analysis of Ki67 positive cells in glands (Table 2).

### Histological Characterization of Early Positive Remodeling of Endometrium

Morphological characteristics of biopsies obtained from mares with endometriosis are presented in Figure 5 A–F. In accordance with [8] the foci of endometriosis, including periglandular stromal cells (“fibrotic stromal cells”) and affected glandular epithelia, as

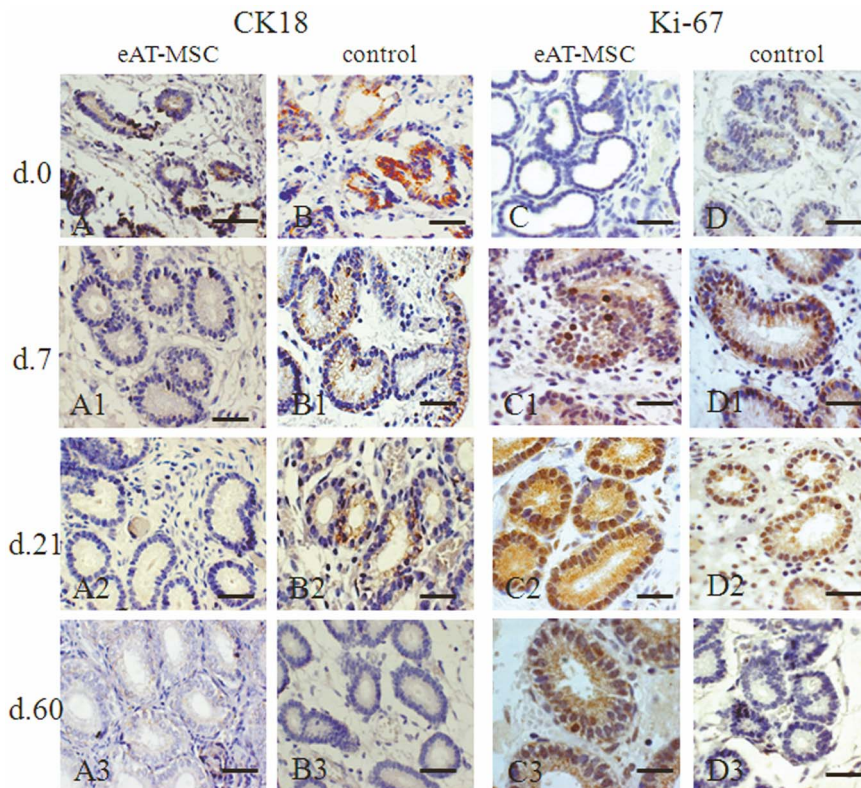

**Figure 4. Cytokeratin 18 (CK18) and Ki-67 expression before (at day 0) and after (at days 7, 21 and 60) eAT-MSCs intrauterine transplantation: A–A3 and D–D3 - experimental group; B–B3 and D–D3 - control.** A, B) At day 0, CK18 (black arrows) localized in damaged epithelia of glands (G). A1–A3) At days 7, 21 and 60, the absence of CK18 expression was observed. B1, B2) At days 7 and 21, CK18 expression was still observed (black arrows) in control. B3) At day 60, control mares showed no signs of CK18 expression. C, D) At day 0, none or a few Ki-67 positive cells were observed. C1, D1) At day 7, amount of Ki-67 positive cells (black arrow) was increased. C2, D2) At day 21, both groups showed positive Ki-67 staining. C3) At day 60, the expression of Ki-67 was still observed. D3) In control, the absence of Ki-67 expression. LM. Scale bars: A–D1 = 50  $\mu$ m; C2, C3, D2, D3 = 25  $\mu$ m.

doi:10.1371/journal.pone.0097889.g004

well as, neighbored unaltered glands, were taken into consideration. In all animals, single glands and/or glandular nests were affected. Following eAT-MSCs transplantation, positive histological changes were observed in three mares (Figure 5 A1–C3). One mare, which presented more severe degree of endometriosis and received the cells, did not show cells engraftment into endometrium (data not shown) as well as morphological improvement (Figure 5D–D3). Control animals show a relatively unaltered pattern of endometrial histology (Figure 5E1–F3).

## Discussion

Endometriosis in mares is characterized by periglandular or stromal fibrosis associated with epithelial alterations in fibrotic glands [1,2]. Such epithelial and stromal mal-differentiation in mares' endometrial causes an altered protein expression pattern which results in a disturbed microenvironment, causing poor embryonic nutrition and early embryo death [26]. Contradictory results have been published concerning the expression of steroid hormone receptors during endometriosis and it is not clear if the expression of selected proteins is direct related with hormonal changes [8]. MSCs are known to promote tissue re-modeling and regeneration through multiple mechanisms such as engraftment, differentiation, immunomodulation and diverse trophic activities [13]. In order to evaluate the effects of MSCs on an altered endometrial microenvironment in mares during breeding season, allogeneic eAT-MSCs were transplanted into the uterus of mares

with endometriosis. Herein, we provided for the first time, evidence that atypical morphological and functional differentiation of glandular and periglandular endometrial stromal cells have changed after eAT-MSCs transplantation into the uterus. According to [8], such altered protein expression pattern of vimentin, laminin, smooth-muscle- $\alpha$ -actin and CK18 was observed in endometrium of mares, thus confirming endometriosis.

The incorporation of these cells following intrauterine transplantation was demonstrated using direct immunofluorescence. MSCs migrated to the periglandular space and in few cases contributed significantly to glandular epithelia improvement. As shown previously, the co-expression of cytokeratin and vimentin is normal during the proliferation phase in human but not in equine endometrium [27–29]. The co-expression of both of these proteins in epithelial cells has been observed in different tumors and for many years CK18 has been recognized as an epithelial marker in histopathological diagnostic [30,31]. Accordingly, we observed the co-expression of these proteins in all mares' endometrium with endometriosis. Following eAT-MSCs transplantation, the co-expression of these markers was no longer observed in mares' endometrium when compared with control group, suggesting positive effect of eAT-MSCs transplantation on the expression pattern of these proteins.

The analysis of expression patterns of proteins as  $\alpha$ -SMA, laminin and Ki-67 antigen support aforementioned data. It has been shown that stromal cells of destructive endometriosis, in

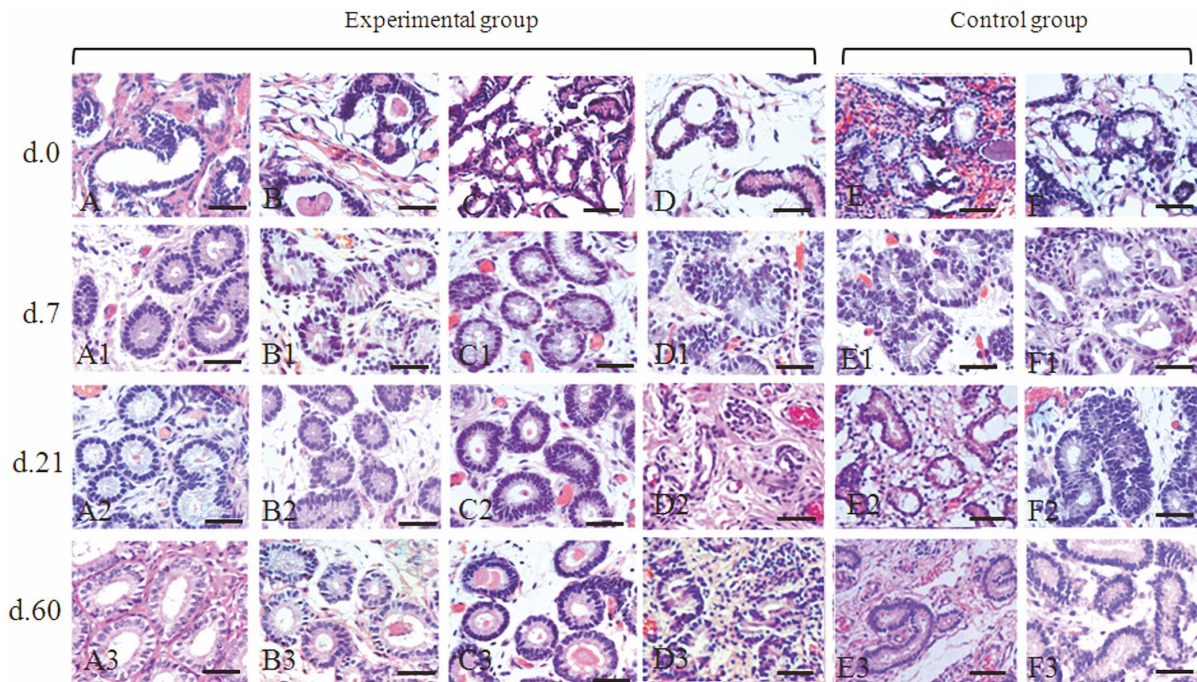

**Figure 5. Histological analysis of alterations in mares' endometrium following eAT-MSCs intrauterine transplantation.** A–D3) Mares which received the cells. DE–F3) Control mares. A–F) Morphology of endometrial surface prior eAT-MSCs intrauterine cells transplantation. A1–D1) Day 7 after eAT-MSCs intrauterine transplantation. A2–D2) Same as in (A1–D1) at day 21. A3–D3) Same as in (A1–D1) at day 60. E1–F3) Respective controls. LM. Scale bars: A–F3 = 50  $\mu$ m. doi:10.1371/journal.pone.0097889.g005

particular in the active destructive endometriosis, tended to express more  $\alpha$ -SMA [7–8]. It is of common knowledge that local stimuli induce smooth muscle differentiation in resident fibroblasts and neighboring epithelial or mesenchymal cells can produce these stimuli [32]. Accordingly, differentiation of periglandular cells to myofibroblasts, leading to a comparable histopathology, was also reported for fibrotic dilated glands of the human endometrium [33]. In our study, the expression of microfilament  $\alpha$ -SMA in uterine glands was observed before eAT-MSCs transplantation in all studied animals, which is in accordance with previous studies [7–8] and well known paracrine effects of MSC [13]. However, at day 7, the expression of  $\alpha$ -SMA was no longer observed in uterine glands of animals which received eAT-MSCs.

Laminin is known to be the major protein in the basal lamina which is a protein network foundation for most cells and organs. Laminin influences cellular differentiation, migration, adhesion as well as phenotype and survival [34]. After eAT-MSCs transplantation, atypical laminin localization, which observed in mares with endometriosis [8], was positively modified in experimental group at day 7 while in control endometrium such alteration did not occur. Atypical laminin localization in both groups before eAT-MSCs transplantation can be explained by the fact that myofibroblasts are known to build up an incomplete layer of basal lamina on their

cell surface which is known to maintain smooth muscle cells in a differentiated state [30].

Ki-67 antigen is an excellent marker to determine the growth cell fraction of a given cell population. An altered intensity of cell proliferation (which also depends on the steroid cycle) within the fibrotic foci during the estrous cycle was shown to be obvious [8]. The effect of extrinsic human MSCs on the viability, proliferation and differentiation of intrinsic cells in the local of injury was demonstrated over past years [12–13]. Accordingly, our data demonstrated that the amount of Ki-67 positive cells was significantly higher in endometrium of mares treated with eAT-MSCs in comparison with untreated animals (Table 2).

At day 7 after eAT-MSCs transplantation, early morphological remodeling of endometrium was observed when compared with untreated mares. Morphological alterations in endometrium were escorted by changes in the expression pattern of analyzed proteins in treated animals but not in control mares which continue to show atypical protein expression pattern until day 21. Taken together, our data provides evidence of morphological and functional benefits of MSCs transplantation into mares with endometriosis.

The number of empty seasons is one of the factors that can influence the incidence of endometriosis. The fact that one animal

**Table 2. Proliferation rate analyzed by Ki-67 antigen expression.**

| Groups                          | 0 Days        | 7 Days         | 21 Days        | 60 Days        |
|---------------------------------|---------------|----------------|----------------|----------------|
| <b>Experimental Group n = 3</b> | 4.09%+/-1.08% | 10.46%+/-3.95% | 67.04%+/-4.8%  | 25.95%+/-5.09% |
| <b>Control Group n = 2</b>      | 9.46%+/-5.01% | 17.08%+/-4.45% | 21.03%+/-6.71% | 3.29%+/-2.09%  |

doi:10.1371/journal.pone.0097889.t002

with advanced degree of endometrial degeneration has not responded to the treatment could suggest the preventive use of stem cells therapy which can slow down the degeneration process that occurs with mares which failed to be pregnant in previous breeding season.

## Conclusion

It is noteworthy that allogeneic eAT-MSCs which were cryopreserved during two years in liquid nitrogen can be used directly after thawing without additional culturing *in vitro*. These cells can be transplanted without application of immunosuppressive protocols while presenting successful and efficient homing in mares' endometrium. Additionally, following intrauterine transplantation, eAT-MSCs were able to induce early (at day 7) and prolonged (until day 60) positive remodeling of endometrial tissue of these mares with endometriosis. These extrinsic allogeneic eAT-MSCs were able to stimulate local environment composed by epithelial and periglandular stromal cells and to modulate the expression of cytokeratin, vimentin,  $\alpha$ -SMA and laminin, thus avoiding further development of pathological processes which leads to the formation of fibrotic regions on horse endometrium.

Our data suggest that these cells similar to human MSCs from bone marrow, act through multiple mechanisms such as homing in

fibrotic periglandular and glandular space, modulation of the expression pattern of studied proteins and increase glandular epithelial cells proliferation thus providing anti-scar effect.

It is important to note, that local therapy is designed to prevent a local recurrence of the injury. Our study targets a local effect of MSCs on injury which takes place in endometrium of mares. Therefore, logic rationality suggests that the combination between local and systemic stem cell therapies may provide more efficient tool to combat endometriosis, one of the major cause for equine infertility.

## Acknowledgments

We are grateful to Alexsander Seixas de Souza for his excellent assistance in confocal microscopy analysis. We also thank Dr Rosa Cabral who provided some uterus biopsies from mares affected by endometriosis which has helped us to better understand the disease.

## Author Contributions

Conceived and designed the experiments: IK LIM RCM AK MAM. Performed the experiments: LIM DSM BPM IK GW. Analyzed the data: IK LIM RCM EM AK. Contributed reagents/materials/analysis tools: IK RCM MAM. Wrote the paper: IK LIM.

## References

- Kenney RM (1992) The etiology, diagnosis and classification of chronic degenerative endometritis. *Equine Vet J* 25: 186.
- Schoon HA, Schoon D, Klug E (1992) Uterusbiospien als Hilfsmittel fur Diagnose und Prognose von Fertilitatsstorungen der Stute. *Pferdeheilkunde* 8: 355–362.
- Kenney RM (1978) Cyclic and pathologic changes of the mare endometrium as detected by biopsy, with a note on early embryonic death. *J Am Vet Med Assoc* 172: 241–262.
- Brunckhorst D, Shoon HA, Bader H, Sieme H (1991) Morphologische, enzym- und immunohistochemische charakteristika des endometrialen yklus der stute. *Fertilität* 7: 44–51.
- Gerstenberg C, Allen WR, Stewart F (1999) Factors controlling epidermal growth factor (EGF) gene expression in the endometrium of the mare. *Mol Reprod Dev* 53: 255–265.
- Aupperle H, Ozgen SSchoon HA, Schoon D, Hoppen HO, et al. (2000) Cyclical endometrial steroid hormone receptor expression and proliferation intensity in the mare. *Equine Vet J* 32: 228–232.
- Walter I, Handler J, Reifinger M, Aurich C (2001) Association of endometriosis in horses with differentiation of periglandular myofibroblasts and changes of extracellular matrix proteins. *Reproduction* 121: 581–586.
- Hoffmann C, Ellenberger C, Mattos RC, Aupperle H, et al. (2009) The equine endometriosis: new insights into the pathogenesis. *Anim Reprod Sci* 111: 261–278.
- Lehmann J, Ellenberger C, Hoffmann C, Bazer FW, et al. (2011) Morpho-functional studies regarding the fertility prognosis of mares suffering from equine endometriosis. *Theriogenology* 76: 1326–1336.
- Aggarwal S, Pittenger MF (2005) Human mesenchymal stem cells modulate allogeneic immune cell responses. *Blood* 105: 1815–1822.
- Uccelli A, Prockop DJ (2010) Why should mesenchymal stem cells (MSCs) cure autoimmune diseases? *Curr Opin Immunol* 22: 768–774.
- Caplan AI (2010) What's in a name? *Tissue Eng Part A* 16: 2415–2417.
- Caplan AI, Correa D (2011) The MSC: an injury drugstore. *Cell Stem Cell* 1: 11–15.
- Sorrell JM, Baber MA, Caplan AI (2009) Influence of adult mesenchymal stem cells on *in vitro* vascular formation. *Tissue Eng Part A* 15: 1751–1761.
- Rehman J, Traktuev D, Li J, Merfeld-Clauss S, et al. (2004) Secretion of angiogenic and antiapoptotic factors by human adipose stromal cells. *Circulation* 109: 1292–1298.
- Wagner J, Kean T, Young R, Dennis JE, et al. (2009) Optimizing mesenchymal stem cell-based therapeutics. *Curr Opin Biotechnol* 20: 531–536.
- Mambelli LI, Santos EJ, Frazão PJ, Chaparro MB, et al. (2009) Characterization of equine adipose tissue-derived progenitor cells before and after cryopreservation. *Tissue Eng Part C Methods* 15: 87–94.
- Kenney RM, Doig PA (1986) Equine endometrial biopsy. *Current Therapy in Theriogenology* 723–729.
- Mambelli LI, Winter GHZ, Kerkis A, Malschitzky E, et al. (2012) A novel strategy of mesenchymal stem cells delivery in the uterus of mares with endometriosis. *Theriogenology* 79: 744–750.
- Schoon HA, Schoon D, Klug E (1997) Die Endometriumbiopsie bei der Stute im klinisch-gynakologischen Kontext. *Pferdeheilkunde* 13: 453–464.
- Schoon HA, Wiegandt I, Schoon D, Aupperle H, et al. (2000) Functional disturbances of the equine endometrium. *J Reprod Fertil* 56: 381–391.
- Kozubenko N, Turnovcova K, Kapcalova M, Butenko O, et al. (2010) Analysis of *in vitro* and *in vivo* characteristics of human embryonic stem cell-derived neural precursors. *Cell Transplant* 19: 471–86.
- Sémont AI, Mouseddine M, François A, Demarquay C, et al. (2010) Mesenchymal stem cells improve small intestinal integrity through regulation of endogenous epithelial cell homeostasis. *Cell Death Differ* 17: 952–61.
- Franke WW, Appelhaus B, Schmid E, Freudenstein C, et al. (1979) The organization of cytokeratin filaments in the intestinal epithelium. *Eur J Cell Biol* 9: 255–268.
- Aupperle H, Schoon D, Schoon HA (2004) Physiological and pathological expression of intermediate filaments in the equine endometrium. *Res Vet Sci* 76: 249–255.
- Bader H, Kremer H, Vogt C, Schoon HA, et al. (1997) Investigations on the protein patterns of the equine uterine secretions as functional parameter of the endometrium. *Pferdeheilkunde* 5: 544.
- Norwitz ER, Fernandez-Shaw S, Barlow DH, Starkey PM (1991) Expression of intermediate filament in endometrial glands changes with the onset of pregnancy and in endometriosis. *Hum Reprod* 6: 1470–1473.
- Tabibzadeh S (1991) Human endometrium: an active site of cytokine production and action. *Endocr Rev* 12: 272–290.
- Nisolle M, Casanas-Roux F, Donnez J (1995) Coexpression of cytokeratin and vimentin in eutopic endometrium and endometriosis throughout the menstrual cycle: evaluation by a computerized method. *Fertil Steril* 64: 69–75.
- McNutt MA, Bolen JW, Gown AM, Hammar SP, et al. (1985) Coexpression of intermediate filaments in human epithelial neoplasms. *Ultrastruct Pathol* 9: 31–43.
- Dabbs DJ, Geisinger KR, Norris HT (1986) Intermediate filaments in endometrial and endocervical carcinomas. The diagnostic utility of vimentin patterns. *Am J Surg Pathol* 10: 568–576.
- Schmitt-Gräf A, Desmoulière A, Gabbiani G (1994) Heterogeneity of myofibroblast phenotypic features: an example of fibroblastic cell plasticity. *Virchows Archiv* 425: 3–24.
- Czernobilsky B, Remadi S, Gabbiani G (1993) Alpha-smooth muscle actin and other stromal markers in endometrial mucosa. *Virchows Archiv* 422: 313–317.
- Timpl R, Rohde H (1979) Laminin – a glycoprotein from basement membranes. *J Biol Chem* 254: 9933–9937.
